# Supplementary material for: Cercosporamide inhibits bone morphogenetic protein receptor type I kinase activity in zebrafish
Source: Oxford University Press journal article supplement (doi:10.1242/dmm.045971), 2020-08-20
Supplement: dmm045971supp.pdf [file dmm045971supp.pdf]

### A Preparative HPLC chromatogram of extracted medium of *A. aquilegiae*

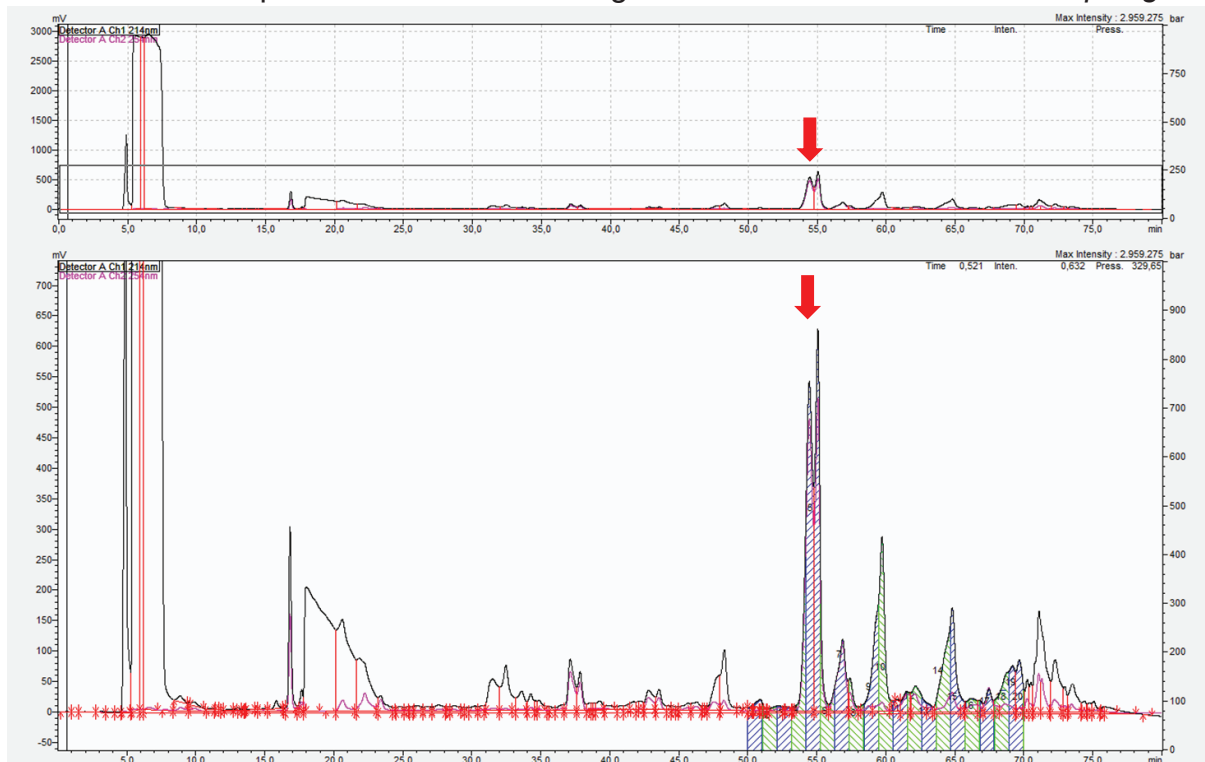

### B Analytical HPLC chromatogram and UV-Vis spectrum of purified fraction

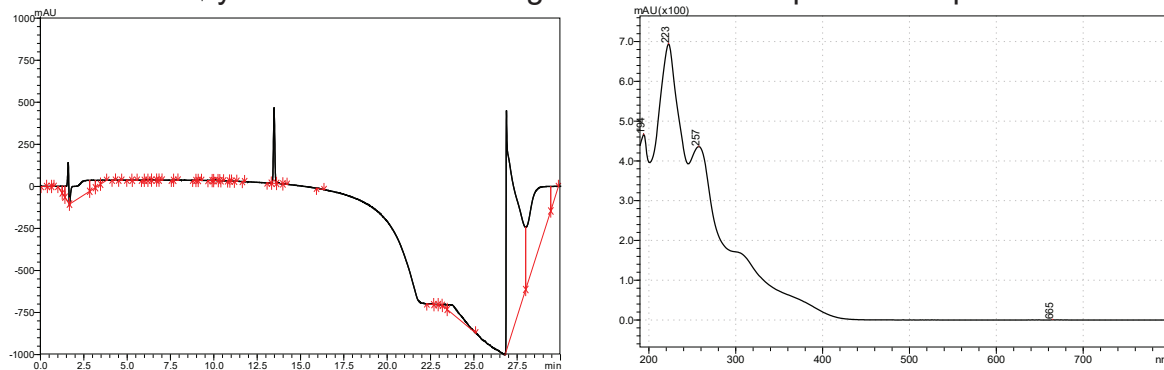

**Fig. S1:** (A) Purification of active fraction (red arrow) through preparative HPLC. (B) Assessment of the purity and aquirement of an UV-Vis spectrum of the active fraction through analytical HPLC with diode array detection.

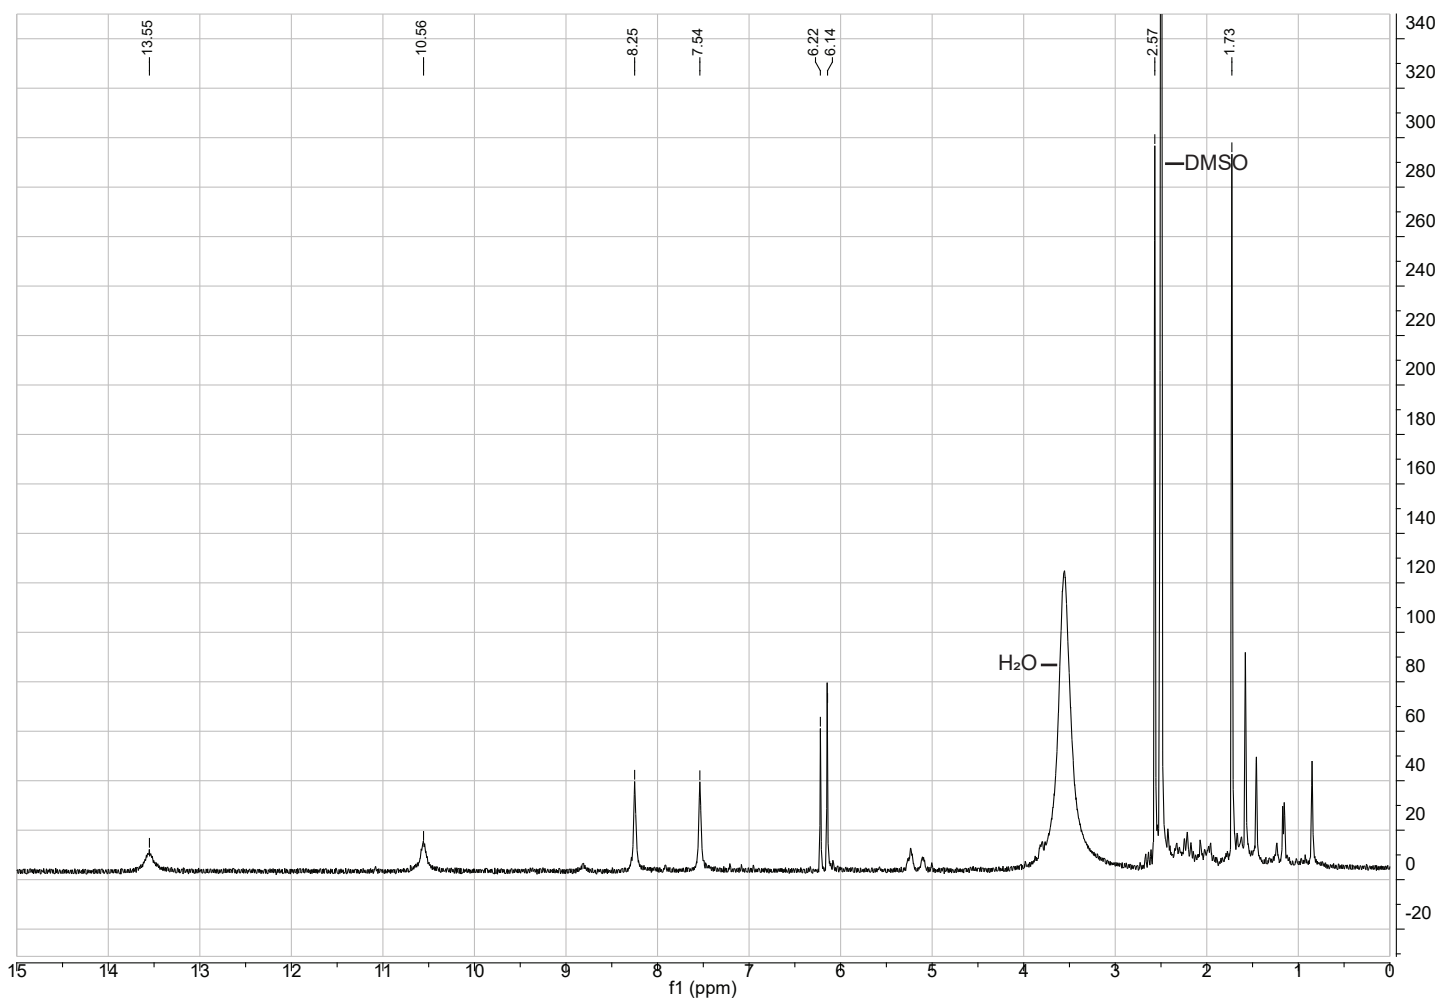

**Fig. S2:** <sup>1</sup>H-NMR spectrum of active preparative HPLC fraction in DMSO-d<sub>6</sub>

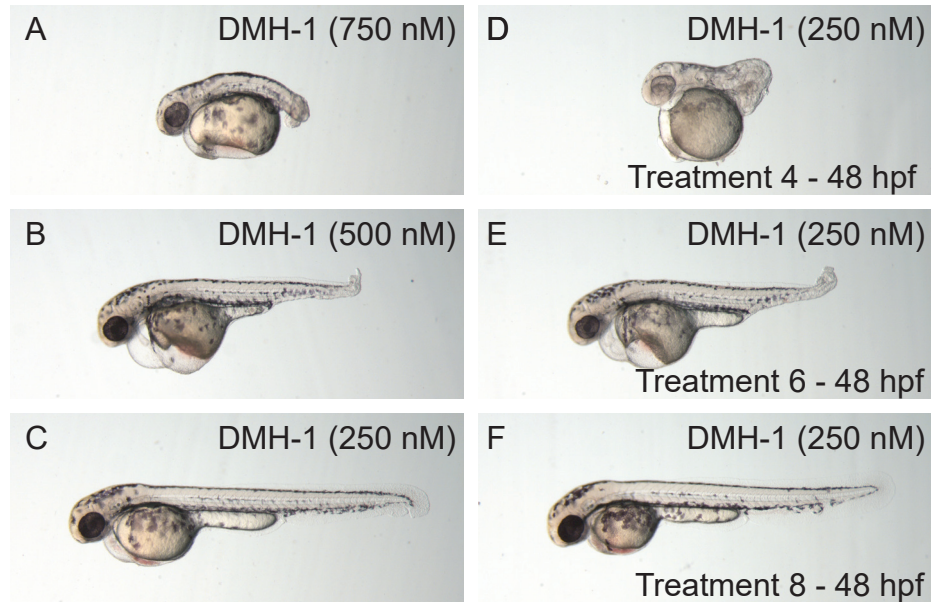

**Fig. S3:** Dose- and time-dependent developmental defects of DMH-1 in zebrafish embryos. (A-C) Examples of phenotypes caused by a dilution range of DMH-1 (750 nM - 250 nM). (D-F) Examples of phenotypes caused by 250 nM DMH-1 with different treatment starting times. Treatment from 2 hpf onwards is lethal. Treatment from 4 hpf is lethal in 50% of the embryos.

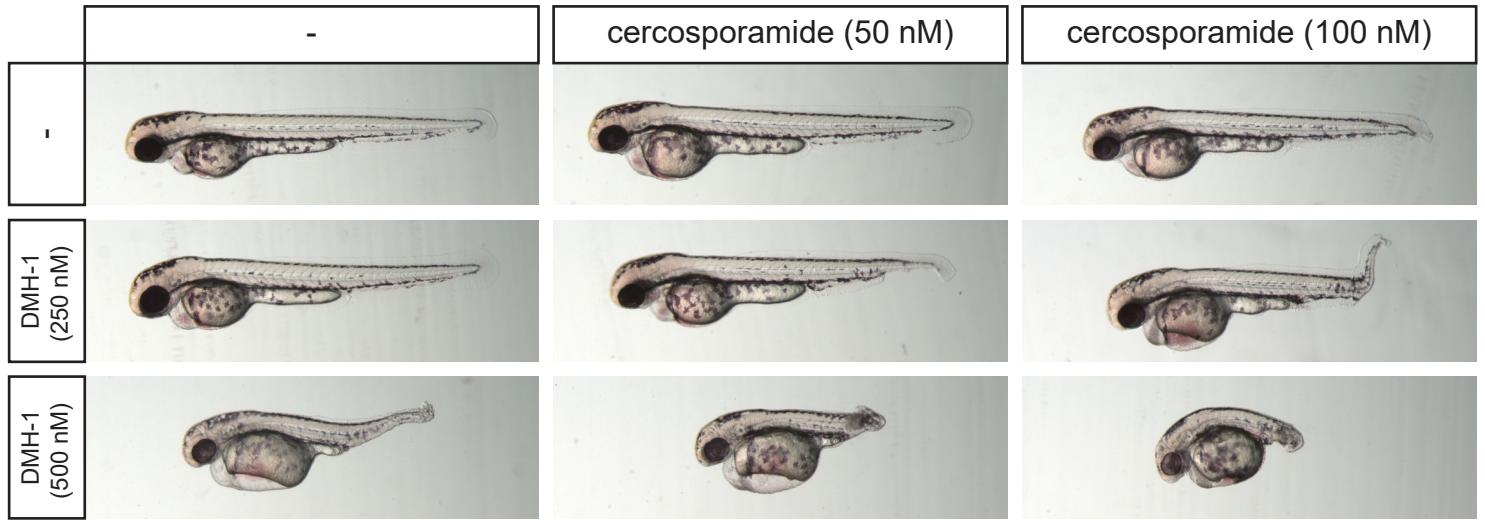

**Fig. S4:** Cercosporamide and known BMP inhibitors cooperate. Combination treatments of zebrafish embryos suggest that cercosporamide acts on BMP signaling pathway. Embryos were treated with cercosporamide (50 or 100 nM) or DMH-1 (250 or 500 nM).

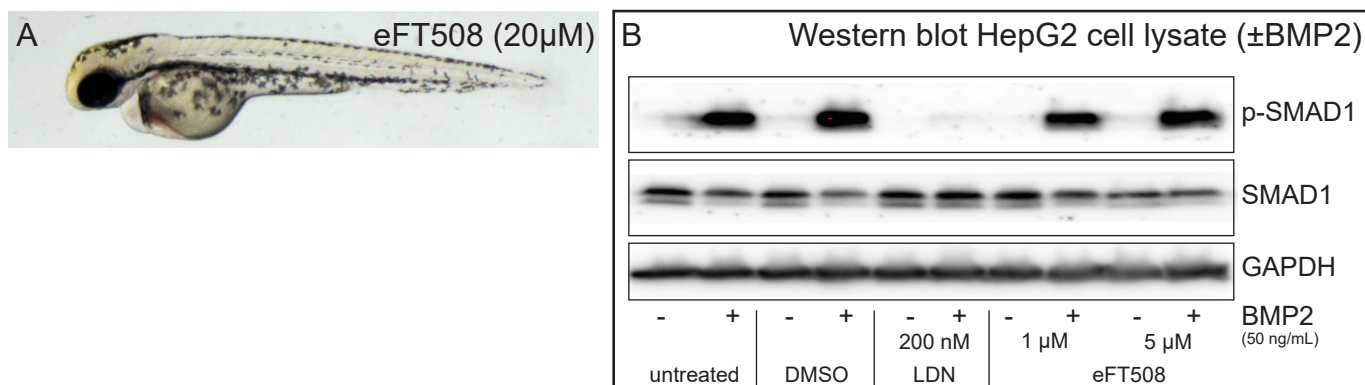

**Fig. S5:** Inhibition of Mnk1/Mnk2 using the potent, selective inhibitor, eFT 508 (A) did not induce developmental defects in zebrafish embryos at 20  $\mu$ M, and (B) did not affect BMP2-induced SMAD 1 phosphorylation in HepG2 cells.

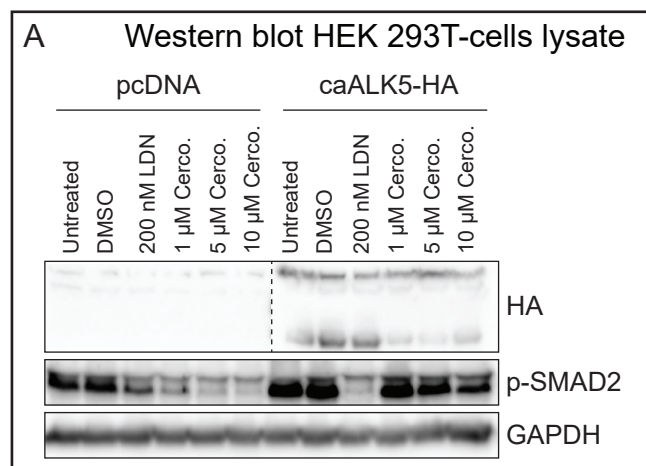

**Fig. S6:** caAlk5 was not inhibited by cercosporamide in transfected HEK 293T-cells.

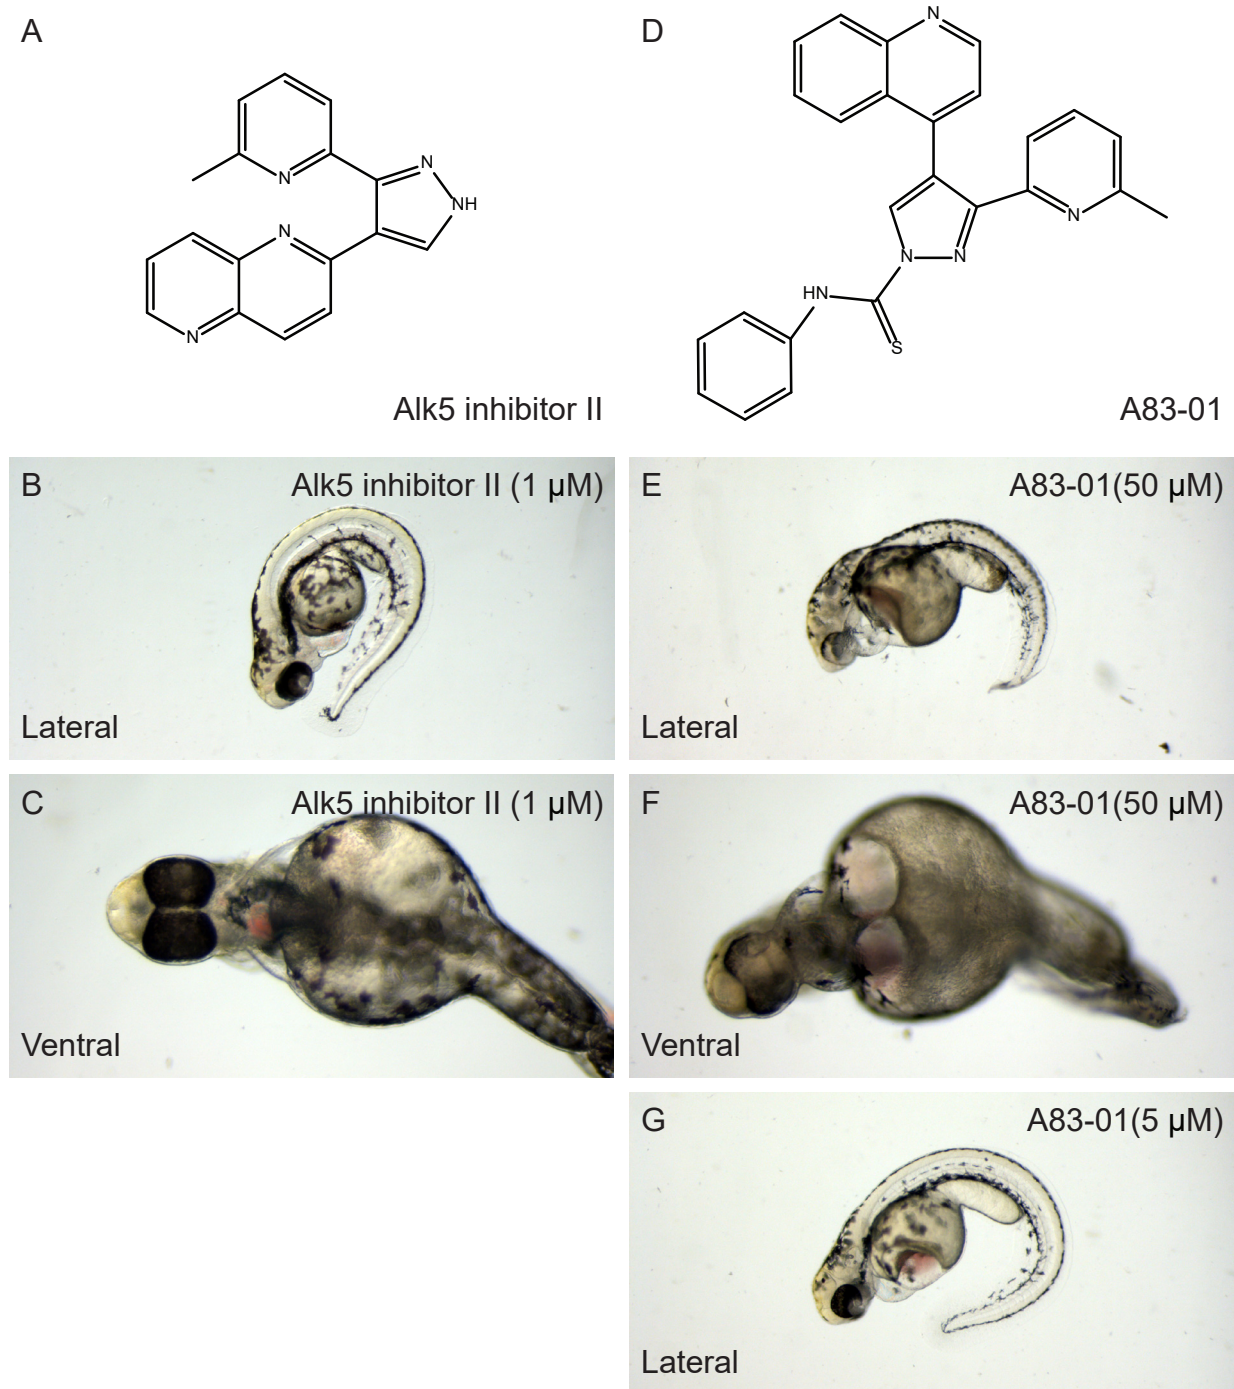

**Fig. S7:** Inhibition of Alk5 using two independent Alk5 inhibitors induced developmental defects that were distinct from the developmental defects induced by known BMP inhibitors and cercosporamide.
